# Supplementary material for: A colon-specific delivery system for quercetin with enhanced cancer prevention based on co-axial electrospinning
Source: Royal Society of Chemistry journal article supplement (doi:10.1039/c8fo01216d), 2018-01-01
Supplement: c8fo01216d1.pdf [file c8fo01216d1.pdf]

### **Supporting information**

Figure S1. HPLC spectrogram of organic standards (1: acetate; 2: propionate; 3: isobutyric acid; 4: n-butyric acid; 5: isovaleric acid; 6: n-pentanoic acid; 7: lactic acid)

Figure S2. Calibration curve of lactic acid

Figure S3. Calibration curve of acetic acid

Figure S4. Calibration curve of propionic acid

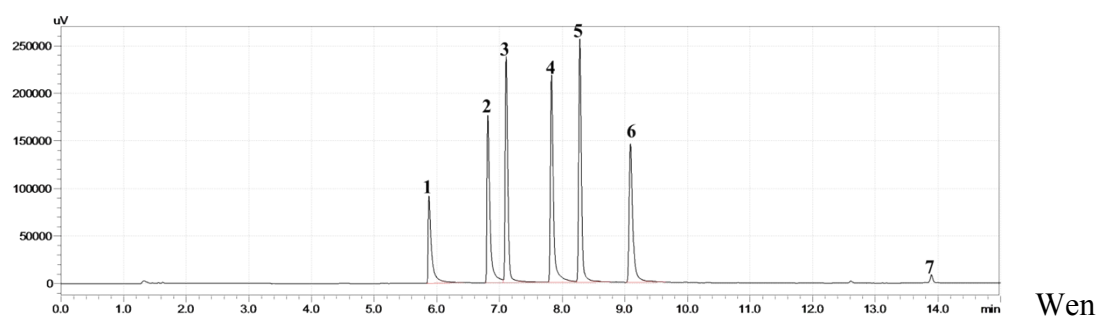

*et al.* Figure S1

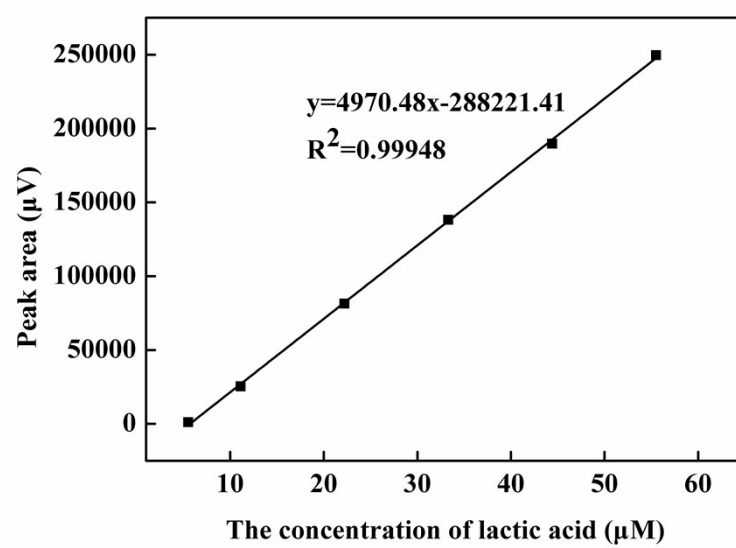

Wen *et al.* Figure S2

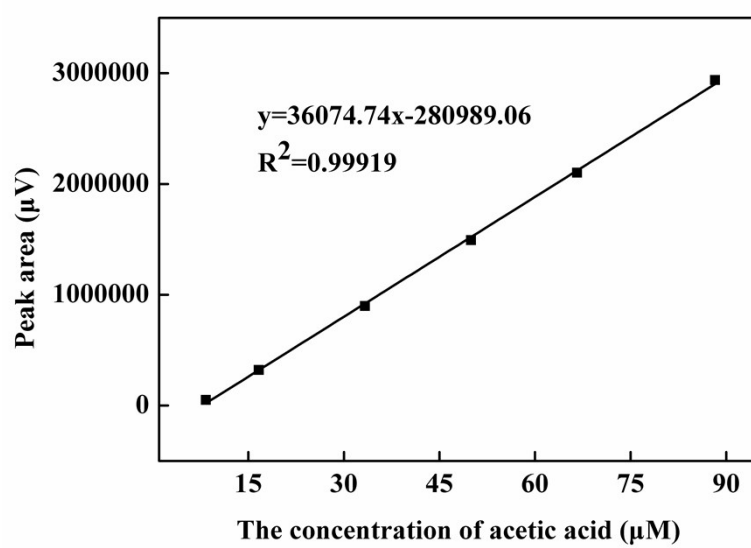

Wen *et al.* Figure S3

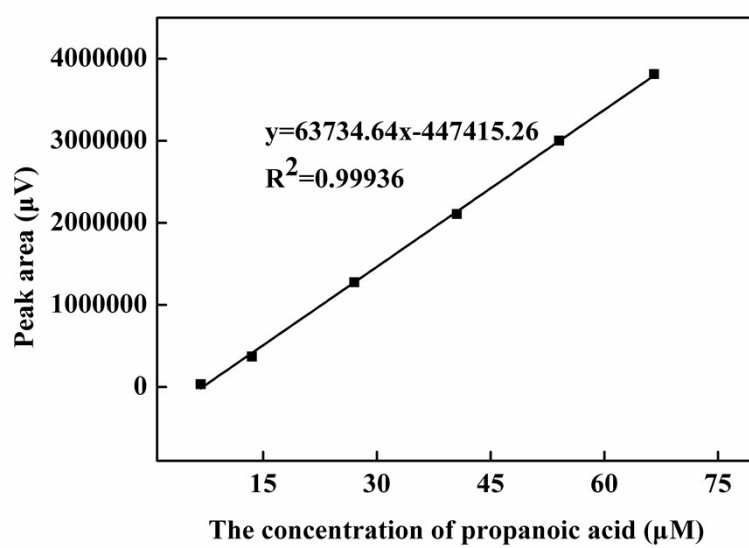

Wen *et al.* Figure S4
